# Supplementary material for: Light control of the peptide-loading complex synchronizes antigen translocation and MHC I trafficking
Source: Springer Nature journal article supplement (doi:10.1038/s42003-021-01890-z), 2021-03-30
Supplement: MOESM3 [file 42003_2021_1890_MOESM3_ESM.pdf]

## **Description of Additional Supplementary Files**

**File Name:** Supplementary Data 1

**Description:** Source data underlying the graphs.

**File Name:** Supplementary Data 2

**Description:** Source data underlying the gels/blots and plasmid maps.
