# Supplementary material for: Light control of the peptide-loading complex synchronizes antigen translocation and MHC I trafficking
Source: Springer Nature journal article supplement (doi:10.1038/s42003-021-01890-z), 2021-03-30
Supplement: MOESM4 [file 42003_2021_1890_MOESM4_ESM.pdf]

Figure 2 b

|                 | core TAP   |                       |                       |
|-----------------|------------|-----------------------|-----------------------|
|                 | amber-free | amber mutation + Bock | amber mutation - Bock |
|                 | 25,60      | 6,50                  | 0,16                  |
|                 | 22,80      | 5,54                  | 0,12                  |
| mVenus positive | 21,70      | 5,33                  | 0,14                  |
| cells (%)       | 28,10      | 5,77                  | 0,29                  |
|                 | 27,60      | 5,67                  | 0,21                  |
|                 | 26,40      | 5,41                  | 0,26                  |
| Mean (%)        | 25,37      | 5,70                  | 0,20                  |
| SEM (%)         | 0,97       | 0,16                  | 0,03                  |
| x-fold change   |            | 29,00                 | 1,00                  |

|                 | TAP        |                       |                       |
|-----------------|------------|-----------------------|-----------------------|
|                 | amber-free | amber mutation + Bock | amber mutation - Bock |
|                 | 30,80      | 7,92                  | 0,20                  |
|                 | 31,50      | 7,31                  | 0,20                  |
| mVenus positive | 30,70      | 8,35                  | 0,17                  |
| cells (%)       | 18,60      | 4,58                  | 0,14                  |
|                 | 18,90      | 3,78                  | 0,19                  |
|                 | 19,90      | 3,70                  | 0,23                  |
| Mean (%)        | 25,07      | 5,94                  | 0,19                  |
| SEM (%)         | 2,43       | 0,80                  | 0,01                  |
| x-fold change   |            | 31,54                 | 1,00                  |

**Figure 3 a**

|                             | raw signal (a.u.) | normalized to amber-free coreTAP (%) |
|-----------------------------|-------------------|--------------------------------------|
| untr                        | 92                | 0,33                                 |
| coreTAP/optPylRS/PCK        | 27409             | 100,00                               |
| coreTAP(TAG)/optPylRS/PCK   | 8719              | 31,81                                |
| coreTAP(TAG)/optPylRS/-UAA  | 342               | 1,25                                 |
| coreTAP(TAG)/optPylRS/BocK  | 334               | 1,22                                 |
| coreTAP(TAG)/w/o PylRS/-UAA | 500               | 1,83                                 |
| coreTAP(TAG)/w/o PylRS/PCK  | 257               | 0,94                                 |
| coreTAP(TAG)/wtPylRS/-UAA   | 692               | 2,53                                 |
| coreTAP(TAG)/wtPylRS/BocK   | 11625             | 42,41                                |
| coreTAP(TAG)/wtPylRS/PCK    | 468               | 1,71                                 |

**Figure 3 b**

|                                | coreTAP/PCK | coreTAP(TAG)/PCK |
|--------------------------------|-------------|------------------|
| solubilisate TAP1              | 11817,288   | 6884,146         |
| purified TAP1                  | 8160,761    | 1137,719         |
| purified TAP2mVenus            | 6580,669    | 900,506          |
| norm to solubisate coreTAP/PCK |             |                  |
| solubilisate TAP1              | 1,00        | 0,583            |
| purified TAP1                  | 8160,76     | 1953,00          |
| purified TAP2mVenus            | 6580,67     | 1545,804         |
| set coreTAP/PCK to 100%        |             |                  |
| TAP1 SBP elution               | 100,00      | 23,93            |
| TAP2mVenus                     | 100,00      | 23,49            |

**Figure 3 c**

|                                    | coreTAP/PCK | coreTAP(TAG)/PCK | coreTAP(TAG)/BocK |
|------------------------------------|-------------|------------------|-------------------|
| cells/single cells/mVenus-A subset | 7918        | 839              | 929               |
| Mean (APC-Fire750-A) (a.u.)        | 7766        | 704              | 880               |
|                                    | 8810        | 634              | 817               |
|                                    | 8463        | 922              | 842               |
| Mean (a.u.)                        | 8239        | 775              | 867               |
| SEM (a.u.)                         | 210         | 56               | 21                |
| set coreTAP/PCK to 100%            |             |                  |                   |
|                                    | 96,10       | 10,18            | 11,28             |
|                                    | 94,26       | 8,54             | 10,68             |
| single data points (%)             | 106,93      | 7,69             | 9,92              |
|                                    | 102,72      | 11,19            | 10,22             |
| Mean (%)                           | 100,00      | 9,40             | 10,52             |
| SEM (%)                            | 3,60        | 0,72             | 0,37              |

**Figure 4 b**

|                                               | light-activated |       |                  |       |                   |       |                 |       |
|-----------------------------------------------|-----------------|-------|------------------|-------|-------------------|-------|-----------------|-------|
|                                               | coreTAP/PCK     |       | coreTAP(TAG)/PCK |       | coreTAP(TAG)/Bock |       | mVenus/mock/PCK |       |
|                                               | ATP             | ADP   | ATP              | ADP   | ATP               | ADP   | ATP             | ADP   |
| cells/single cells/mVenus-A subset            | 59760           | 8219  | 16304            | 4677  | 6462              | 6038  | 3015            | 7104  |
| Mean (Alexa Fluor 647-A) (a.u.)               | 54147           | 7848  | 16538            | 6489  | 5528              | 6264  | 5054            | 6285  |
|                                               | 54804           | 9849  | 21180            | 7393  | 3938              | 7740  | 3637            | 10507 |
| Mean (a.u.)                                   | 56237           | 8639  | 18007            | 6186  | 5309              | 6681  | 3902            | 7965  |
| SEM (a.u.)                                    | 1447            | 502   | 1296             | 652   | 602               | 436   | 493             | 1055  |
| set light-activated coreTAP/PCK + ATP to 100% |                 |       |                  |       |                   |       |                 |       |
| single data points (%)                        | 106,26          | 14,61 | 28,99            | 8,32  | 11,49             | 10,74 | 5,36            | 12,63 |
|                                               | 96,28           | 13,96 | 29,41            | 11,54 | 9,83              | 11,14 | 8,99            | 11,18 |
|                                               | 97,45           | 17,51 | 37,66            | 13,15 | 7,00              | 13,76 | 6,47            | 18,68 |
| Mean (%)                                      | 100,00          | 15,36 | 32,02            | 11,00 | 9,44              | 11,88 | 6,94            | 14,16 |
| SEM (%)                                       | 3,64            | 0,98  | 2,45             | 1,19  | 1,10              | 0,83  | 0,89            | 1,91  |

**Figure 4 c**

|                                           | light-activated |       |              |       |               |       |                 |       |
|-------------------------------------------|-----------------|-------|--------------|-------|---------------|-------|-----------------|-------|
|                                           | TAP/PCK         |       | TAP(TAG)/PCK |       | TAP(TAG)/Bock |       | mVenus/mock/PCK |       |
|                                           | ATP             | ADP   | ATP          | ADP   | ATP           | ADP   | ATP             | ADP   |
| cells/single cells/mVenus-A subset        | 54348           | 10797 | 33392        | 8359  | 6390          | 7197  | 6848            | 6886  |
| Mean (Alexa Fluor 647-A) (a.u.)           | 41590           | 7674  | 38228        | 7046  | 6183          | 6500  | 4947            | 7233  |
|                                           | 48885           | 4872  | 37636        | 4093  | 3784          | 4924  | 3234            | 4373  |
| Mean (a.u.)                               | 48274           | 7781  | 36419        | 6499  | 5452          | 6207  | 5010            | 6164  |
| SEM (a.u.)                                | 3017            | 1397  | 1243         | 1030  | 683           | 549   | 852             | 736   |
| set light-activated TAP/PCK + ATP to 100% |                 |       |              |       |               |       |                 |       |
| single data points (%)                    | 112,58          | 22,37 | 69,17        | 17,32 | 13,24         | 14,91 | 14,19           | 14,26 |
|                                           | 86,15           | 15,90 | 79,19        | 14,60 | 12,81         | 13,46 | 10,25           | 14,98 |
|                                           | 101,26          | 10,09 | 77,96        | 8,48  | 7,84          | 10,20 | 6,70            | 9,06  |
| Mean (%)                                  | 100,00          | 16,12 | 75,44        | 13,46 | 11,29         | 12,86 | 10,38           | 12,77 |
| SEM (%)                                   | 8,84            | 3,06  | 5,37         | 2,29  | 1,58          | 1,39  | 1,88            | 1,72  |

Figure 5 a, c

|                                    | coreTAP(TAG)/PCK |       |        |        |        |        | coreTAP/PCK |        |
|------------------------------------|------------------|-------|--------|--------|--------|--------|-------------|--------|
|                                    | w/o hv           | 0 h   | 1 h    | 2 h    | 3 h    | 4 h    | w/o hv      | 4 h    |
| cells/single cells/mVenus-A subset | 885,0            | 850,0 | 1374,0 | 1686,0 | 1627,0 | 1870,0 | 6902,0      | 5749,0 |
| Mean (APC-Fire750-A) (a.u.)        | 879,0            | 867,0 | 1369,0 | 1891,0 | 1952,0 | 1982,0 | 7592,0      | 6141,0 |
|                                    | 1186,0           | 729,0 | 877,0  | 1193,0 | 1347,0 | 2037,0 | 7563,0      | 6834,0 |
| Mean (a.u.)                        | 983,3            | 815,3 | 1206,7 | 1590,0 | 1642,0 | 1963,0 | 7352,3      | 6241,3 |
| SEM (a.u.)                         | 82,8             | 35,5  | 134,6  | 169,1  | 142,7  | 40,1   | 184,0       | 259,0  |

One-way analysis of variance

|                                            |          |
|--------------------------------------------|----------|
| P value                                    | < 0.0001 |
| P value summary                            | ***      |
| Are means signif. different?<br>(P < 0.05) | Yes      |
| Number of groups                           | 6        |
| F                                          | 14,97    |
| R squared                                  | 0,8618   |

ANOVA Table

|                             | SS      | df | MS     |
|-----------------------------|---------|----|--------|
| Treatment (between columns) | 2874000 | 5  | 574700 |
| Residual (within columns)   | 460800  | 12 | 38400  |
| Total                       | 3334000 | 17 |        |

Tukey's Multiple Comparison Test

|            | Mean Diff. | q      | Significant? P < 0.05? | Summary | 95% CI of diff  |
|------------|------------|--------|------------------------|---------|-----------------|
| w/o vs 0 h | 168,0      | 1,485  | No                     | ns      | -369.5 to 705.5 |
| w/o vs 1 h | -223,4     | 1,975  | No                     | ns      | -760.9 to 314.1 |
| w/o vs 2 h | -606,7     | 5,363  | Yes                    | *       | -1144 to -69.19 |
| w/o vs 3 h | -658,7     | 5,822  | Yes                    | *       | -1196 to -121.2 |
| w/o vs 4 h | -979,7     | 8,659  | Yes                    | ***     | -1517 to -442.2 |
| 0 h vs 1 h | -391,4     | 3,460  | No                     | ns      | -928.9 to 146.1 |
| 0 h vs 2 h | -774,7     | 6,847  | Yes                    | **      | -1312 to -237.2 |
| 0 h vs 3 h | -826,7     | 7,307  | Yes                    | **      | -1364 to -289.2 |
| 0 h vs 4 h | -1148      | 10,14  | Yes                    | ***     | -1685 to -610.2 |
| 1 h vs 2 h | -383,3     | 3,388  | No                     | ns      | -920.8 to 154.2 |
| 1 h vs 3 h | -435,3     | 3,848  | No                     | ns      | -972.8 to 102.2 |
| 1 h vs 4 h | -756,3     | 6,685  | Yes                    | **      | -1294 to -218.8 |
| 2 h vs 3 h | -52,00     | 0,4596 | No                     | ns      | -589.5 to 485.5 |
| 2 h vs 4 h | -373,0     | 3,297  | No                     | ns      | -910.5 to 164.5 |
| 3 h vs 4 h | -321,0     | 2,837  | No                     | ns      | -858.5 to 216.5 |

Figure 5 b, d

|                                    | w/o hv | 0 h    | TAP(TAG)/PCK |        |        |        | TAP/PCK |         |
|------------------------------------|--------|--------|--------------|--------|--------|--------|---------|---------|
|                                    |        |        | 1 h          | 2 h    | 3 h    | 4 h    | w/o hv  | 4 h     |
| cells/single cells/mVenus-A subset | 1241,0 | 1195,0 | 1748,0       | 2128,0 | 2508,0 | 2598,0 | 7512,0  | 8275,0  |
| Mean (APC-Fire750-A) (a.u.)        | 1933,0 | 1385,0 | 1543,0       | 1978,0 | 2387,0 | 2456,0 | 7407,0  | 7356,0  |
|                                    | 1355,0 | 1243,0 | 1927,0       | 2198,0 | 2411,0 | 2640,0 | 7482,0  | 10248,0 |
| Mean (a.u.)                        | 1509,7 | 1274,3 | 1739,3       | 2101,3 | 2435,3 | 2564,7 | 7467,0  | 8626,3  |
| SEM (a.u.)                         | 174,9  | 46,6   | 90,6         | 53,0   | 30,2   | 45,5   | 25,5    | 696,6   |

One-way analysis of variance

|                                            |          |
|--------------------------------------------|----------|
| P value                                    | < 0.0001 |
| P value summary                            | ***      |
| Are means signif. different?<br>(P < 0.05) | Yes      |
| Number of groups                           | 6        |
| F                                          | 34,13    |
| R squared                                  | 0,9343   |

ANOVA Table

|                             | SS      | df | MS     |
|-----------------------------|---------|----|--------|
| Treatment (between columns) | 3990000 | 5  | 798100 |
| Residual (within columns)   | 280600  | 12 | 23380  |
| Total                       | 4271000 | 17 |        |

Tukey's Multiple Comparison Test

|            | Mean Diff. | q     | Significant? P < 0.05? | Summary | 95% CI of diff   |
|------------|------------|-------|------------------------|---------|------------------|
| w/o vs 0 h | 235,4      | 2,666 | No                     | ns      | -184.0 to 654.8  |
| w/o vs 1 h | -229,6     | 2,601 | No                     | ns      | -649.0 to 189.8  |
| w/o vs 2 h | -591,6     | 6,701 | Yes                    | **      | -1011 to -172.2  |
| w/o vs 3 h | -925,6     | 10,48 | Yes                    | ***     | -1345 to -506.2  |
| w/o vs 4 h | -1055      | 11,95 | Yes                    | ***     | -1474 to -635.6  |
| 0 h vs 1 h | -465,0     | 5,267 | Yes                    | *       | -884.4 to -45.58 |
| 0 h vs 2 h | -827,0     | 9,368 | Yes                    | ***     | -1246 to -407.6  |
| 0 h vs 3 h | -1161      | 13,15 | Yes                    | ***     | -1580 to -741.6  |
| 0 h vs 4 h | -1290      | 14,62 | Yes                    | ***     | -1710 to -871.0  |
| 1 h vs 2 h | -362,0     | 4,101 | No                     | ns      | -781.4 to 57.42  |
| 1 h vs 3 h | -696,0     | 7,884 | Yes                    | **      | -1115 to -276.6  |
| 1 h vs 4 h | -825,4     | 9,350 | Yes                    | ***     | -1245 to -406.0  |
| 2 h vs 3 h | -334,0     | 3,783 | No                     | ns      | -753.4 to 85.42  |
| 2 h vs 4 h | -463,4     | 5,249 | Yes                    | *       | -882.8 to -43.98 |
| 3 h vs 4 h | -129,4     | 1,466 | No                     | ns      | -548.8 to 290.0  |

**Supplementary Fig. 2**

|                                    | PCK (nM) |        |        |        |        |        |        |        |        |  |
|------------------------------------|----------|--------|--------|--------|--------|--------|--------|--------|--------|--|
|                                    | 0        | 1      | 2      | 3      | 4      | 5      | 10     | 15     | 20     |  |
| cells/single cells/mVenus-A subset | 1869,0   | 1680,0 | 1879,0 | 2020,0 | 1902,0 | 2199,0 | 2340,0 | 2083,0 | 2293   |  |
| Mean (mVenus-A) (a.u.)             | 1785,0   | 1813,0 | 1893,0 | 2034,0 | 2087,0 | 2075,0 | 2152,0 | 2201,0 | 2353   |  |
|                                    | 1722,0   | 1516,0 | 1960,0 | 1889,0 | 2028,0 | 2110,0 | 2259,0 | 2342,0 | 2342   |  |
| Mean (a.u.)                        | 1792,0   | 1669,7 | 1910,7 | 1981,0 | 2005,7 | 2128,0 | 2250,3 | 2208,7 | 2329,3 |  |
| SEM (a.u.)                         | 34,8     | 70,1   | 20,4   | 37,7   | 44,5   | 30,1   | 44,5   | 61,1   | 15,1   |  |

|                                    | PCK (nM) |        |        |        |        |        |
|------------------------------------|----------|--------|--------|--------|--------|--------|
|                                    | 30       | 40     | 50     | 100    | 250    | 500    |
| cells/single cells/mVenus-A subset | 2395     | 2417   | 2360   | 2577   | 2524   | 2434   |
| Mean (mVenus-A) (a.u.)             | 2521     | 2452   | 2558   | 2524   | 2557   | 2438   |
|                                    | 2384     | 2494   | 2423   | 2581   | 2662   | 2455   |
| Mean (a.u.)                        | 2433,3   | 2454,3 | 2447,0 | 2560,7 | 2581,0 | 2442,3 |
| SEM (a.u.)                         | 35,9     | 18,2   | 47,7   | 15,0   | 34,0   | 5,3    |

**Supplementary Fig. 4 a**

|                                               | w/o illumination |       |                  |       |                   |       |                 |       |
|-----------------------------------------------|------------------|-------|------------------|-------|-------------------|-------|-----------------|-------|
|                                               | coreTAP/PCK      |       | coreTAP(TAG)/PCK |       | coreTAP(TAG)/Bock |       | mVenus/mock/PCK |       |
|                                               | ATP              | ADP   | ATP              | ADP   | ATP               | ADP   | ATP             | ADP   |
| cells/single cells/mVenus-A subset            | 19132            | 6039  | 3632             | 5650  | 3816              | 5276  | 3470            | 6484  |
| Mean (Alexa Fluor 647-A) (a.u.)               | 62202            | 8934  | 5890             | 7837  | 6006              | 7606  | 3694            | 8376  |
|                                               | 76204            | 7951  | 6900             | 6508  | 6408              | 7132  | 6380            | 8014  |
| Mean (a.u.)                                   | 52513            | 7641  | 5474             | 6665  | 5410              | 6671  | 4515            | 7625  |
| SEM (a.u.)                                    | 14022            | 694   | 789              | 519   | 658               | 580   | 763             | 473   |
| set light-activated coreTAP/PCK + ATP to 100% |                  |       |                  |       |                   |       |                 |       |
| single data points (%)                        | 34,02            | 10,74 | 6,46             | 10,05 | 6,79              | 9,38  | 6,17            | 11,53 |
|                                               | 110,61           | 15,89 | 10,47            | 13,94 | 10,68             | 13,52 | 6,57            | 14,89 |
|                                               | 135,51           | 14,14 | 12,27            | 11,57 | 11,39             | 12,68 | 11,34           | 14,25 |
| Mean (%)                                      | 93,38            | 13,59 | 9,73             | 11,85 | 9,62              | 11,86 | 8,03            | 13,56 |
| SEM (%)                                       | 25,05            | 1,28  | 1,42             | 0,97  | 1,20              | 1,08  | 1,37            | 0,91  |

|                                               | light-activated |       |                  |       |                   |       |                 |       |
|-----------------------------------------------|-----------------|-------|------------------|-------|-------------------|-------|-----------------|-------|
|                                               | coreTAP/PCK     |       | coreTAP(TAG)/PCK |       | coreTAP(TAG)/Bock |       | mVenus/mock/PCK |       |
|                                               | ATP             | ADP   | ATP              | ADP   | ATP               | ADP   | ATP             | ADP   |
| cells/single cells/mVenus-A subset            | 59760           | 8219  | 16304            | 4677  | 6462              | 6038  | 3015            | 7104  |
| Mean (Alexa Fluor 647-A) (a.u.)               | 54147           | 7848  | 16538            | 6489  | 5528              | 6264  | 5054            | 6285  |
|                                               | 54804           | 9849  | 21180            | 7393  | 3938              | 7740  | 3637            | 10507 |
| Mean (a.u.)                                   | 56237           | 8639  | 18007            | 6186  | 5309              | 6681  | 3902            | 7965  |
| SEM (a.u.)                                    | 1447            | 502   | 1296             | 652   | 602               | 436   | 493             | 1055  |
| set light-activated coreTAP/PCK + ATP to 100% |                 |       |                  |       |                   |       |                 |       |
| single data points (%)                        | 106,26          | 14,61 | 28,99            | 8,32  | 11,49             | 10,74 | 5,36            | 12,63 |
|                                               | 96,28           | 13,96 | 29,41            | 11,54 | 9,83              | 11,14 | 8,99            | 11,18 |
|                                               | 97,45           | 17,51 | 37,66            | 13,15 | 7,00              | 13,76 | 6,47            | 18,68 |
| Mean (%)                                      | 100,00          | 15,36 | 32,02            | 11,00 | 9,44              | 11,88 | 6,94            | 14,16 |
| SEM (%)                                       | 3,64            | 0,98  | 2,45             | 1,19  | 1,10              | 0,83  | 0,89            | 1,91  |

One-way analysis of variance  
P value < 0.0001  
P value summary \*\*\*  
Are means signif. different? (P < 0.05) Yes  
Number of groups 4  
F 43,45  
R squared 0,9422

| ANOVA Table                 | SS    | df | MS    |
|-----------------------------|-------|----|-------|
| Treatment (between columns) | 1014  | 3  | 338,1 |
| Residual (within columns)   | 62,26 | 8  | 7,782 |
| Total                       | 1077  | 11 |       |

| Tukey's Multiple Comparison Test | Mean Diff. | q      | Significant? P < 0.05? | Summary | 95% CI of diff   |
|----------------------------------|------------|--------|------------------------|---------|------------------|
| ADP vs ADP + hv                  | 0,8500     | 0,5278 | No                     | ns      | -6.444 to 8.144  |
| ADP vs ATP                       | 2,120      | 1,316  | No                     | ns      | -5.174 to 9.414  |
| ADP vs ATP +hv                   | -20,17     | 12,52  | Yes                    | ***     | -27.46 to -12.88 |
| ADP + hv vs ATP                  | 1,270      | 0,7885 | No                     | ns      | -6.024 to 8.564  |
| ADP + hv vs ATP +hv              | -21,02     | 13,05  | Yes                    | ***     | -28.31 to -13.73 |
| ATP vs ATP +hv                   | -22,29     | 13,84  | Yes                    | ***     | -29.58 to -15.00 |

**Supplementary Fig. 4 b**

|                                           | w/o illumination |        |                        |         |                  |       |                 |       |
|-------------------------------------------|------------------|--------|------------------------|---------|------------------|-------|-----------------|-------|
|                                           | TAP/PCK          |        | TAP(TAG)/PCK           |         | TAP(TAG)/BocK    |       | mVenus/mock/PCK |       |
|                                           | ATP              | ADP    | ATP                    | ADP     | ATP              | ADP   | ATP             | ADP   |
| cells/single cells/mVenus-A subset        | 53355            | 9694   | 7791                   | 9418    | 7898             | 11529 | 5958            | 11118 |
| Mean (Alexa Fluor 647-A) (a.u.)           | 57877            | 7544   | 6128                   | 6357    | 5814             | 6456  | 5432            | 6849  |
|                                           | 57054            | 5508   | 3681                   | 4684    | 3680             | 3972  | 3102            | 4364  |
| Mean (a.u.)                               | 56095            | 7582   | 5867                   | 6820    | 5797             | 7319  | 4831            | 7444  |
| SEM (a.u.)                                | 1135             | 987    | 975                    | 1132    | 994              | 1816  | 717             | 1610  |
| set light-activated TAP/PCK + ATP to 100% |                  |        |                        |         |                  |       |                 |       |
| single data points (%)                    | 110,52           | 20,08  | 16,14                  | 19,51   | 16,36            | 23,88 | 12,34           | 23,03 |
|                                           | 119,89           | 15,63  | 12,69                  | 13,17   | 12,04            | 13,37 | 11,25           | 14,19 |
|                                           | 118,19           | 11,41  | 7,63                   | 9,70    | 7,62             | 8,23  | 6,43            | 9,04  |
| Mean (%)                                  | 116,20           | 15,71  | 12,15                  | 14,13   | 12,01            | 15,16 | 10,01           | 15,42 |
| SEM (%)                                   | 7,63             | 2,27   | 2,16                   | 2,51    | 2,19             | 3,88  | 1,61            | 3,47  |
|                                           | light-activated  |        |                        |         |                  |       |                 |       |
|                                           | TAP/PCK          |        | TAP(TAG)/PCK           |         | TAP(TAG)/BocK    |       | mVenus/mock/PCK |       |
|                                           | ATP              | ADP    | ATP                    | ADP     | ATP              | ADP   | ATP             | ADP   |
| cells/single cells/mVenus-A subset        | 54348            | 10797  | 33392                  | 8359    | 6390             | 7197  | 6848            | 6886  |
| Mean (Alexa Fluor 647-A) (a.u.)           | 41590            | 7674   | 38228                  | 7046    | 6183             | 6500  | 4947            | 7233  |
|                                           | 48885            | 4872   | 37636                  | 4093    | 3784             | 4924  | 3234            | 4373  |
| Mean (a.u.)                               | 48274            | 7781   | 36419                  | 6499    | 5452             | 6207  | 5010            | 6164  |
| SEM (a.u.)                                | 3017             | 1397   | 1243                   | 1030    | 683              | 549   | 852             | 736   |
| set light-activated TAP/PCK + ATP to 100% |                  |        |                        |         |                  |       |                 |       |
| single data points (%)                    | 112,58           | 22,37  | 69,17                  | 17,32   | 13,24            | 14,91 | 14,19           | 14,26 |
|                                           | 86,15            | 15,90  | 79,19                  | 14,60   | 12,81            | 13,46 | 10,25           | 14,98 |
|                                           | 101,26           | 10,09  | 77,96                  | 8,48    | 7,84             | 10,20 | 6,70            | 9,06  |
| Mean (%)                                  | 100,00           | 16,12  | 75,44                  | 13,46   | 11,29            | 12,86 | 10,38           | 12,77 |
| SEM (%)                                   | 8,84             | 3,06   | 5,37                   | 2,29    | 1,58             | 1,39  | 1,88            | 1,72  |
| One-way analysis of variance              | TAP(TAG)/PCK     |        |                        |         |                  |       |                 |       |
| P value                                   | < 0.0001         |        |                        |         |                  |       |                 |       |
| P value summary                           | ***              |        |                        |         |                  |       |                 |       |
| Are means signif. different? (P < 0.05)   | Yes              |        |                        |         |                  |       |                 |       |
| Number of groups                          | 4                |        |                        |         |                  |       |                 |       |
| F                                         | 85,90            |        |                        |         |                  |       |                 |       |
| R squared                                 | 0,9699           |        |                        |         |                  |       |                 |       |
| ANOVA Table                               | SS               | df     | MS                     |         |                  |       |                 |       |
| Treatment (between columns)               | 8709             | 3      | 2903                   |         |                  |       |                 |       |
| Residual (within columns)                 | 270,4            | 8      | 33,79                  |         |                  |       |                 |       |
| Total                                     | 8979             | 11     |                        |         |                  |       |                 |       |
| Tukey's Multiple Comparison Test          | Mean Diff.       | q      | Significant? P < 0.05? | Summary | 95% CI of diff   |       |                 |       |
| ADP vs ADP +hv                            | 0,6636           | 0,1977 | No                     | ns      | -14.54 to 15.86  |       |                 |       |
| ADP vs ATP                                | 1,974            | 0,5882 | No                     | ns      | -13.23 to 17.17  |       |                 |       |
| ADP vs ATP +hv                            | -61,31           | 18,27  | Yes                    | ***     | -76.51 to -46.11 |       |                 |       |
| ADP +hv vs ATP                            | 1,311            | 0,3905 | No                     | ns      | -13.89 to 16.51  |       |                 |       |
| ADP +hv vs ATP +hv                        | -61,98           | 18,47  | Yes                    | ***     | -77.18 to -46.78 |       |                 |       |
| ATP vs ATP +hv                            | -63,29           | 18,86  | Yes                    | ***     | -78.49 to -48.09 |       |                 |       |



**Supplementary Fig. 5**

|                                    |        | coreTAP |        |        |        |
|------------------------------------|--------|---------|--------|--------|--------|
|                                    | 0 h    | 2 h     | 4 h    | 6 h    | 8 h    |
| cells/single cells/mVenus-A subset | 1689   | 3952    | 5933   | 7205   | 7637   |
| Mean (APC-Fire750-A) (a.u.)        | 1439   | 3466    | 5487   | 6939   | 6712   |
|                                    | 1676   | 3934    | 6280   | 6903   | 7730   |
| Mean (a.u.)                        | 1601,3 | 3784,0  | 5900,0 | 7015,7 | 7359,7 |
| SEM (a.u.)                         | 66,3   | 129,9   | 187,4  | 77,8   | 265,3  |
