# Supplementary material for: Light control of the peptide-loading complex synchronizes antigen translocation and MHC I trafficking
Source: Springer Nature journal article supplement (doi:10.1038/s42003-021-01890-z), 2021-03-30
Supplement: MOESM5 [file 42003_2021_1890_MOESM5_ESM.pdf]

Plasmid maps

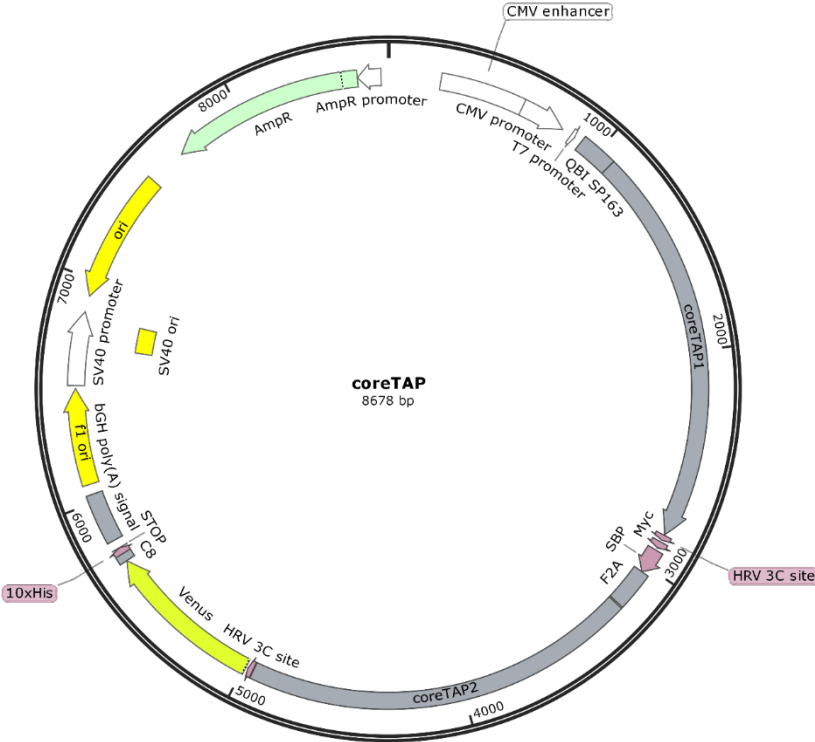

Plasmid encoding for coreTAP

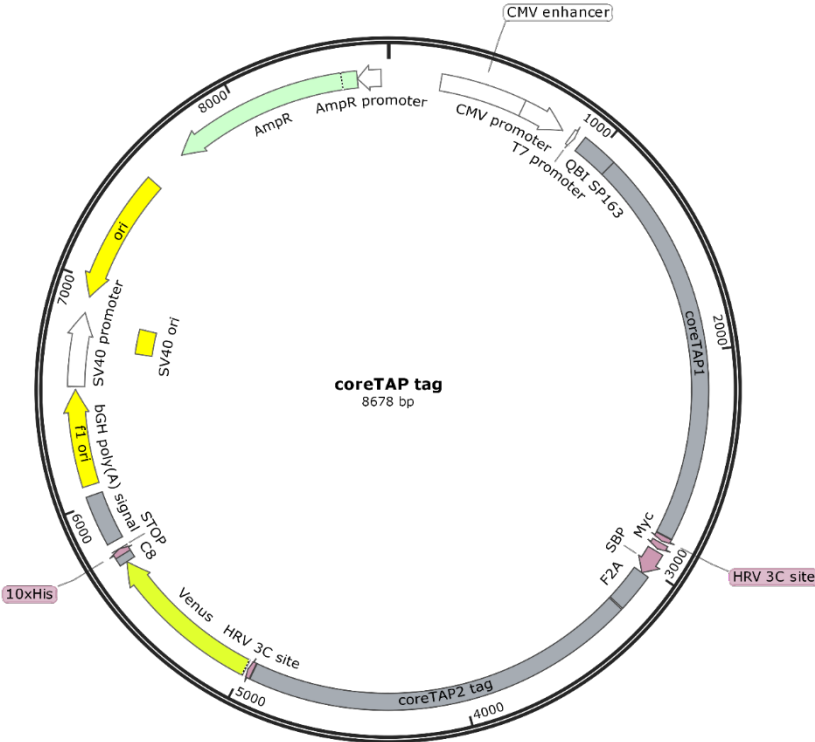

Plasmid encoding for coreTAP<sup>TAG</sup>

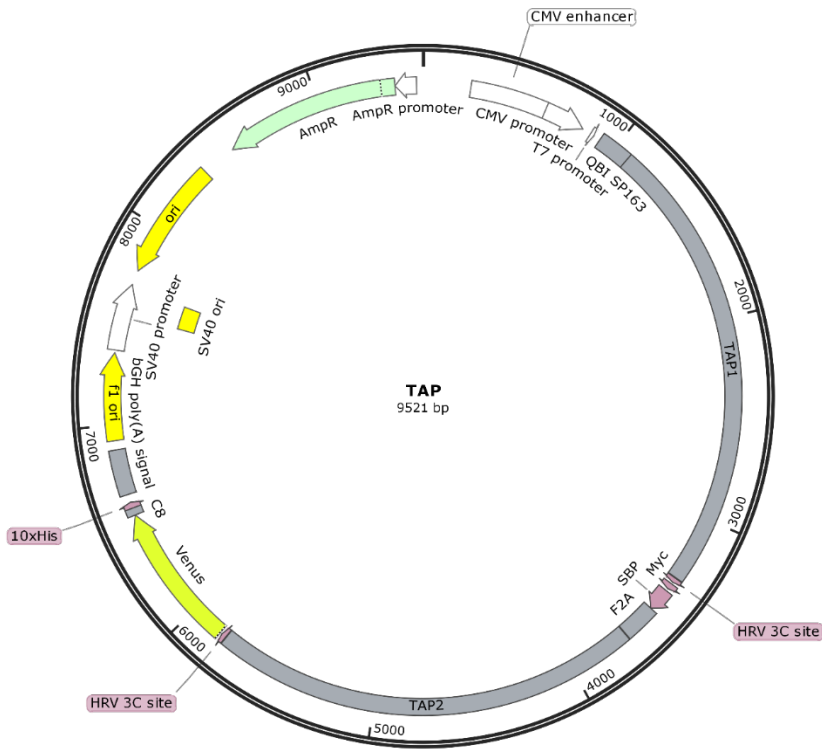

Plasmid encoding for TAP

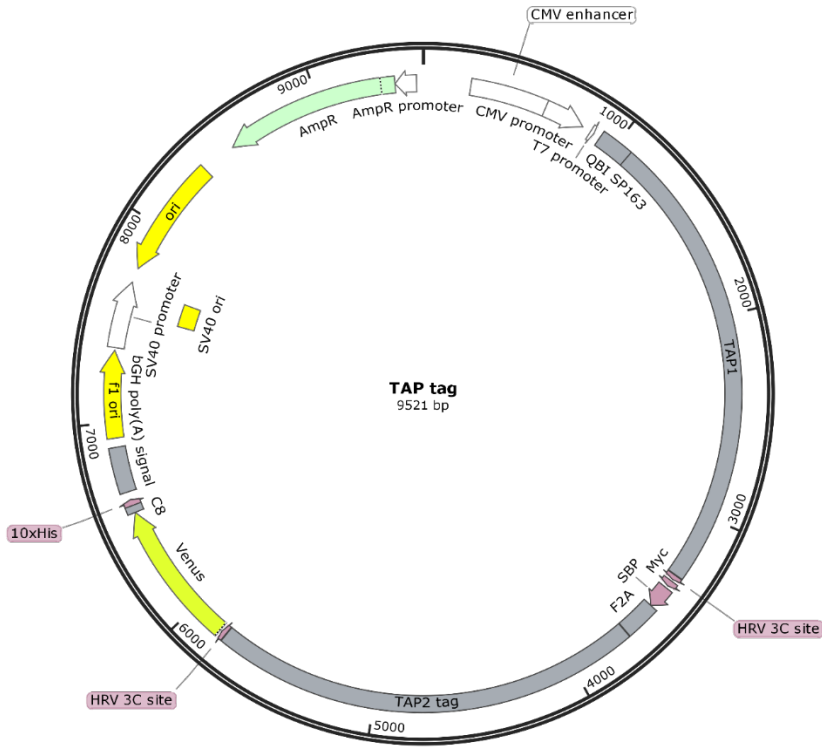

Plasmid encoding for TAP<sup>TAG</sup>

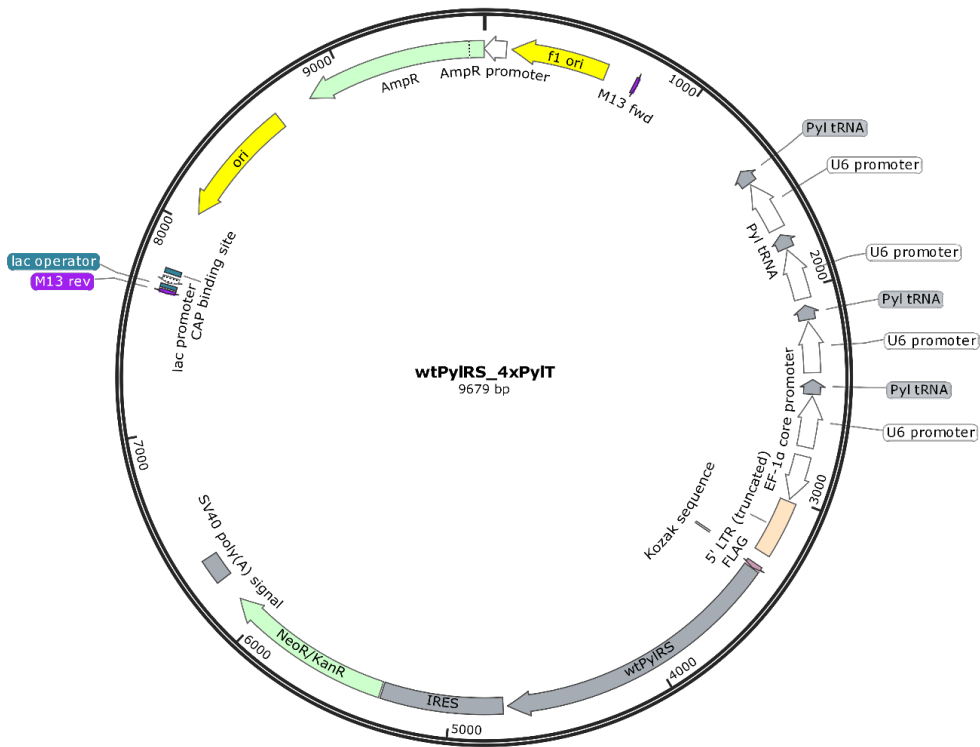

Plasmid encoding for wtPyIRS

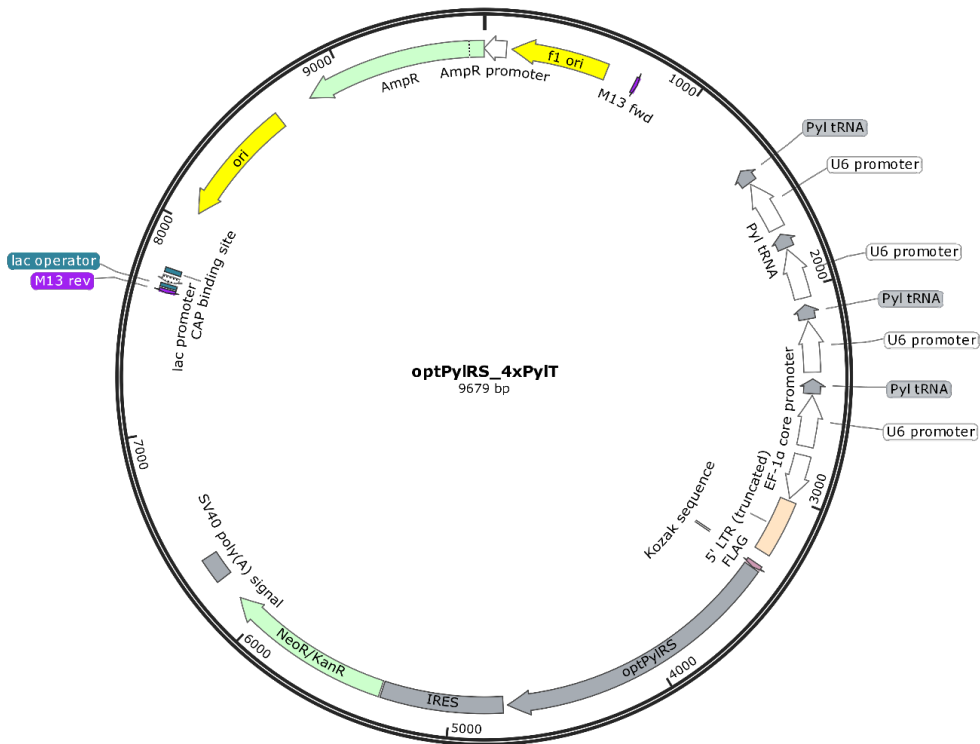

Plasmid encoding for optPyIRS

Figure 2 c

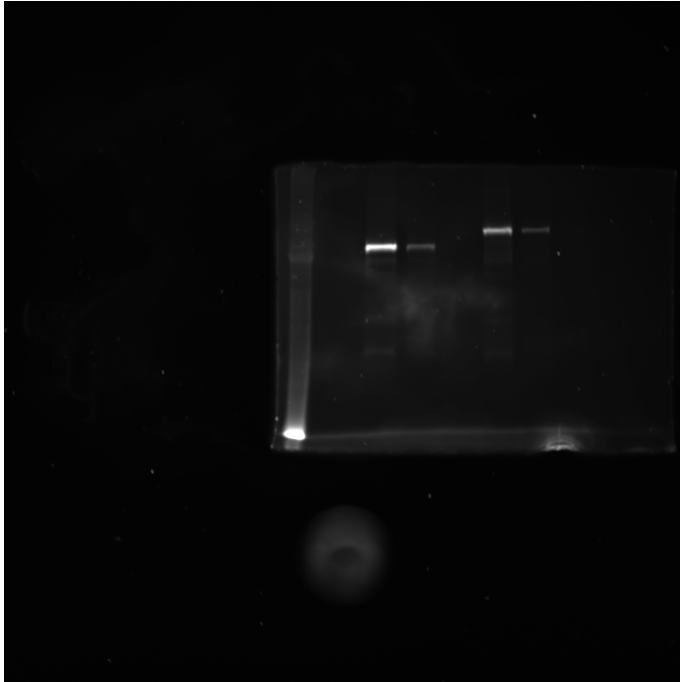

mVenus in-gel fluorescence (ex/em 480/535)

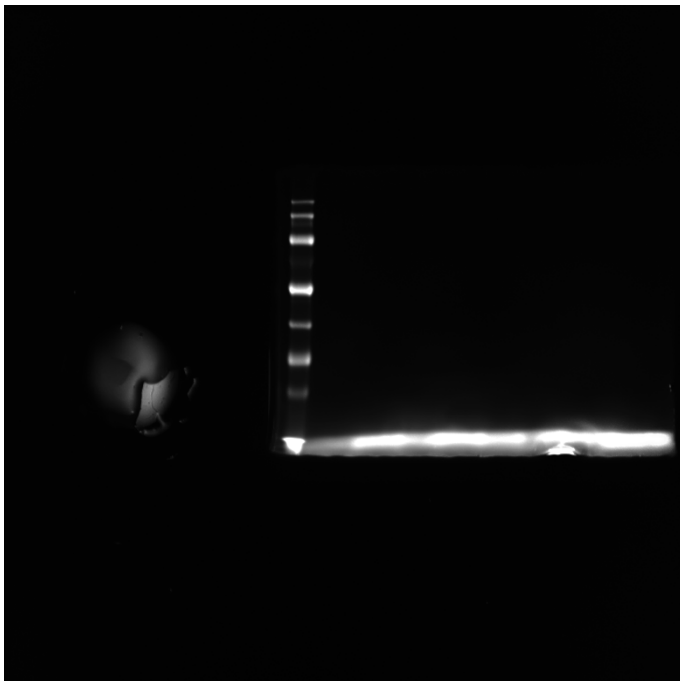

mVenus in-gel fluorescence marker image

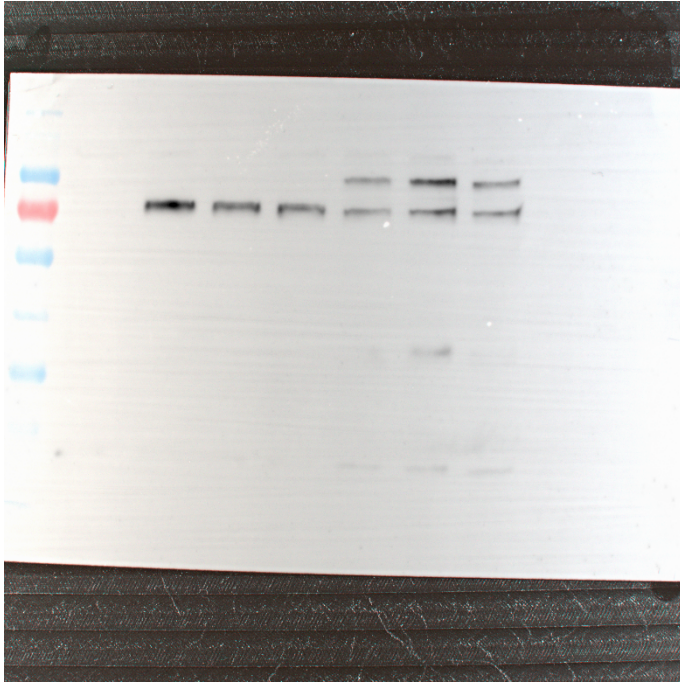

anti-TAP1 (148.3)

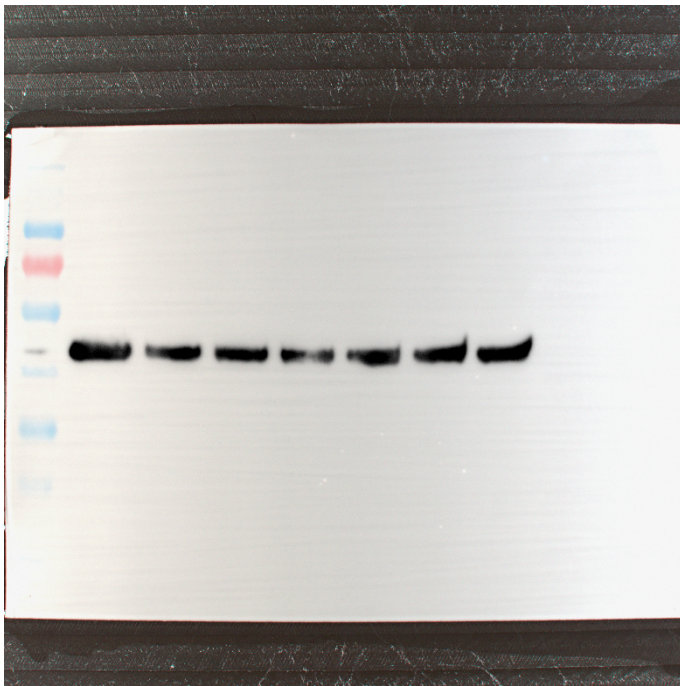

anti- $\beta$ -actin (AC-74, Sigma-Aldrich)

**Figure 3 a**

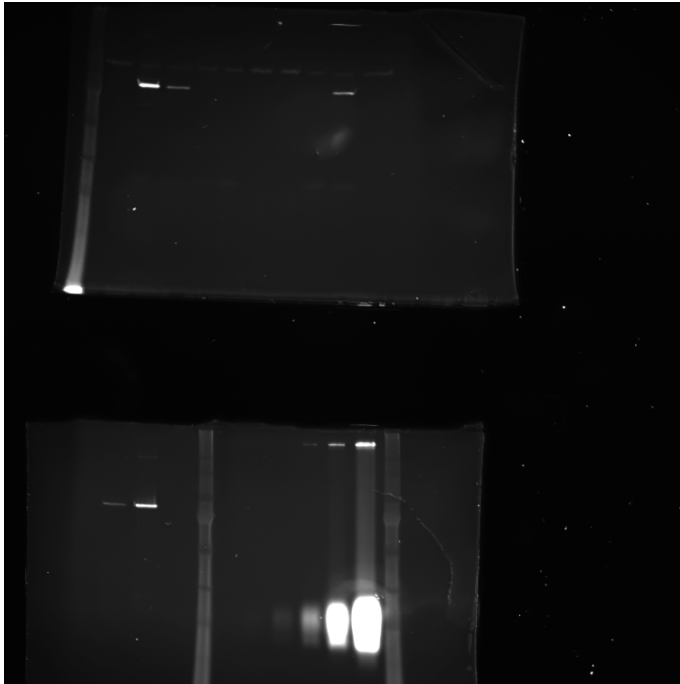

mVenus in-gel fluorescence (ex/em 480/535)  
(upper gel)

**Figure 3 b**

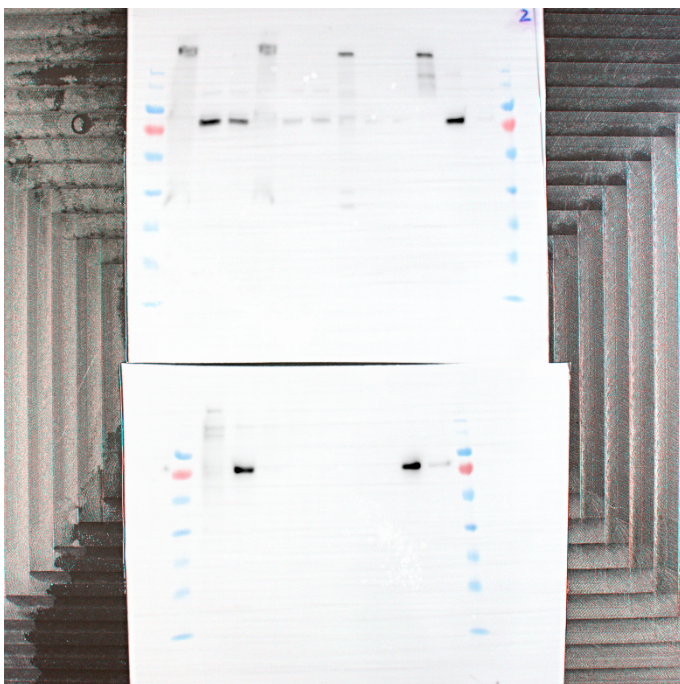

input, anti-TAP1 (148.3)  
(upper blot, lane 1-4 from the left)

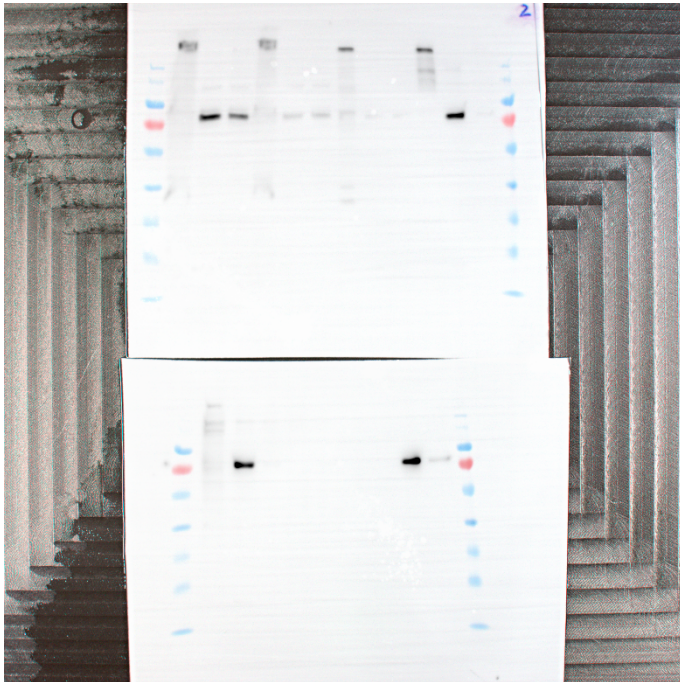

purified protein, anti-TAP1 (148.3)

(lower blot, lane 1-4 from the right)

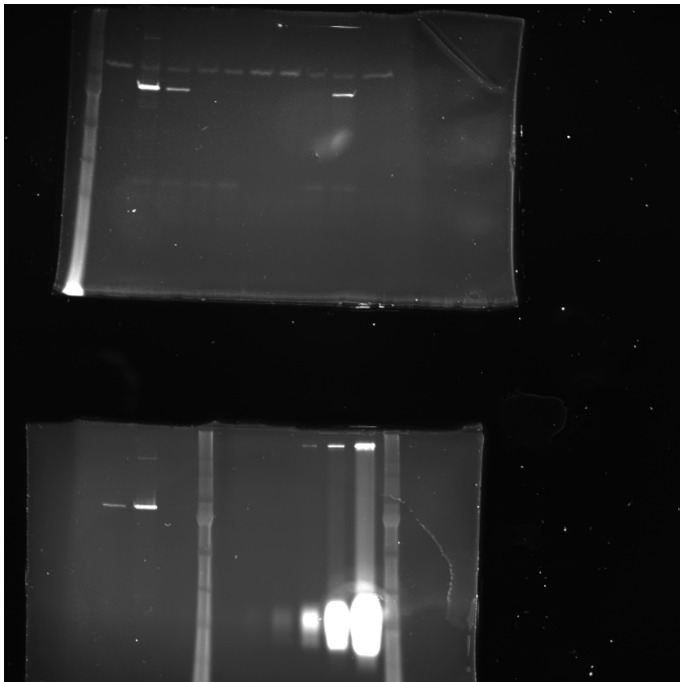

purified protein, mVenus in-gel fluorescence (ex/em 480/535)

(lower gel, lane 1-4 from the left)
